# Supplementary material for: A simple method to synthesize multifunctional silica nanocomposites, NPs@SiO2, using polyvinylpyrrolidone (PVP) as a mediator
Source: Royal Society of Chemistry journal article supplement (doi:10.1039/b924702e), 2010-01-01
Supplement: b924702e.pdf [file b924702e.pdf]

Supplementary Information

# A Simple Method to Synthesize Multifunctional Silica Nanocomposites, NP@SiO<sub>2</sub>, Using Polyvinylpyrrolidone (PVP) as a Mediator

Jinmyung Cha, Cui Ping, and Jin-Kyu Lee\*

*Department of Chemistry, Seoul National University, Seoul, Korea*

*E-mail: jinkle@snu.ac.kr*

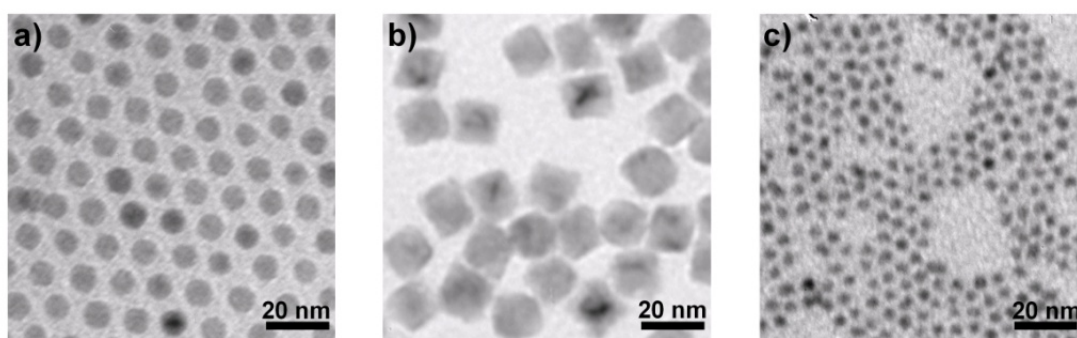

Figure SI 1. TEM images of a) Fe<sub>3</sub>O<sub>4</sub> nanoparticles, b) MnO nanoparticles, and c) CdSe/ZnSe quantum dots.

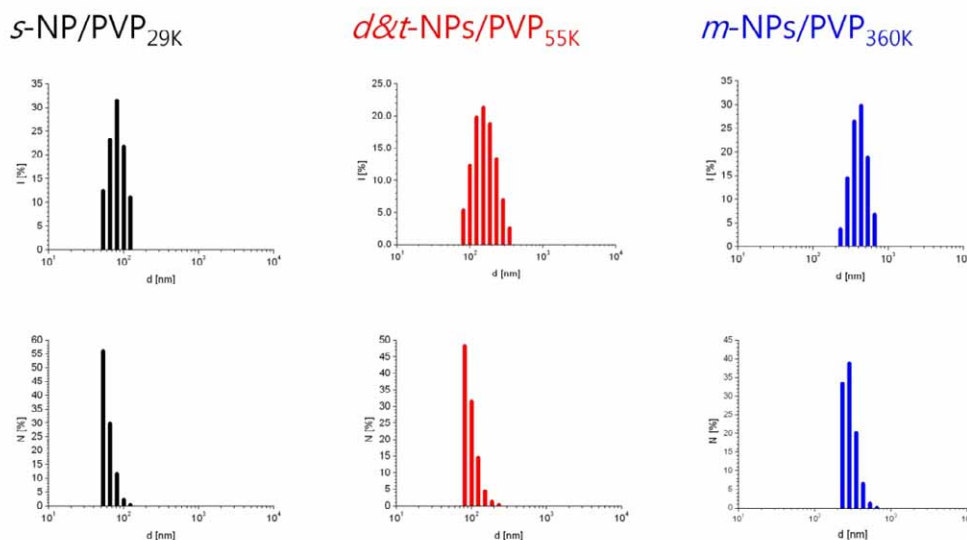

Figure SI 2. The size distribution of NPs/PVP in Figure 2a-c measured by light scattering method

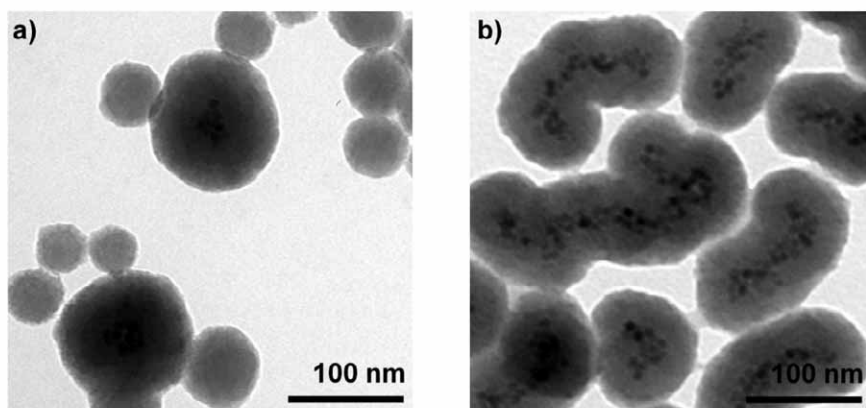

Figure SI 3. TEM images indicating the formation of a) empty silica particles at low concentrations ( $1 \text{ mgmL}^{-1}$ ) of  $m\text{-Fe}_3\text{O}_4/\text{PVP}$  and b) chain-shaped silica nanocomposites at high concentrations (over  $5 \text{ mgmL}^{-1}$ ) of  $m\text{-Fe}_3\text{O}_4/\text{PVP}$ .

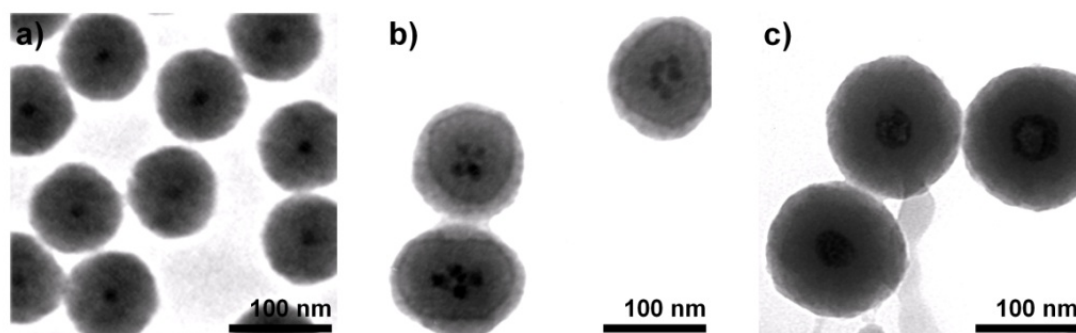

Figure SI 4. TEM images of a)  $s\text{-MnO@SiO}_2$ , b)  $m\text{-MnO@SiO}_2$ , and c)  $m\text{-CdSe/ZnSe@SiO}_2$ .

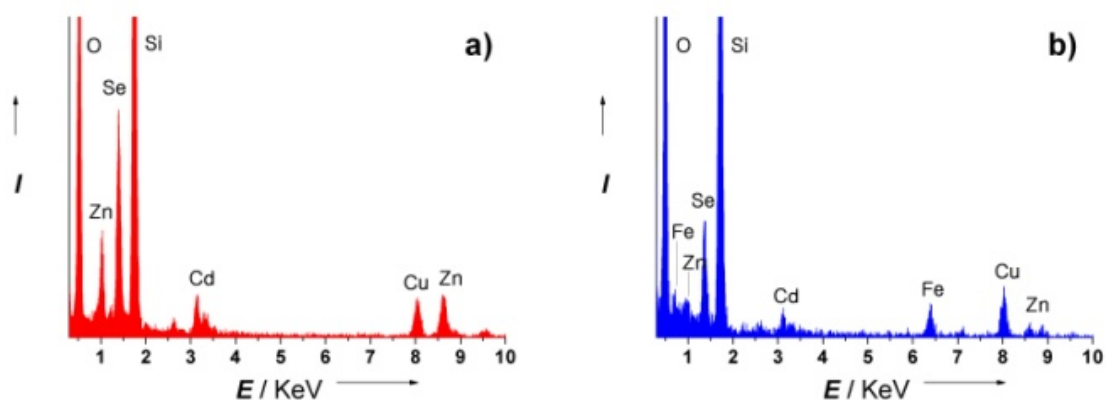

Figure SI 5. EDS spectra of a) m-CdSe/ZnSe@SiO<sub>2</sub> and b) m-[Fe<sub>3</sub>O<sub>4</sub>-CdSe/ZnSe]@SiO<sub>2</sub>.

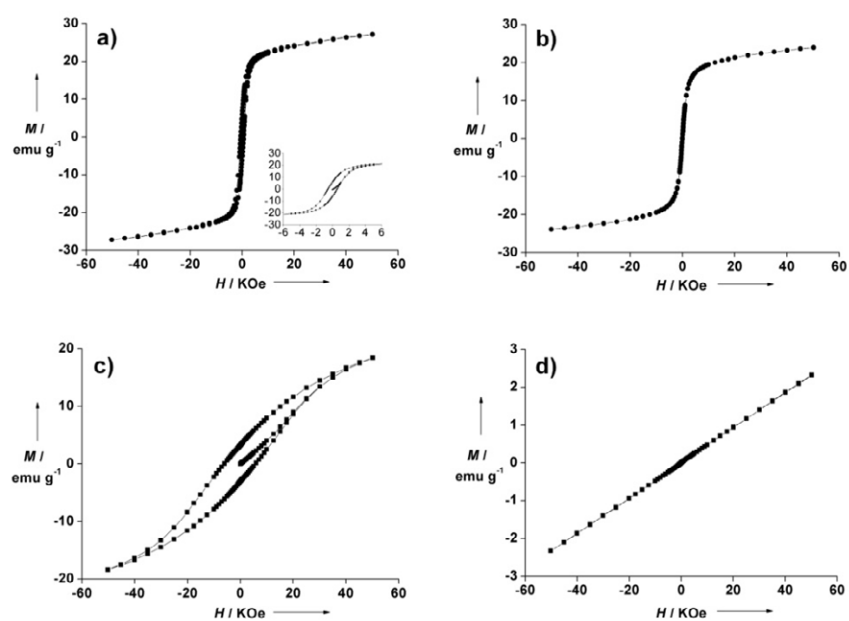

Figure SI 6. Field-dependent magnetization at a, c) 5 K and b, d) 300 K for a, b) Fe<sub>3</sub>O<sub>4</sub> nanoparticles and c, d) MnO nanoparticles. Inset of a) shows the coercivity of Fe<sub>3</sub>O<sub>4</sub> nanoparticles.

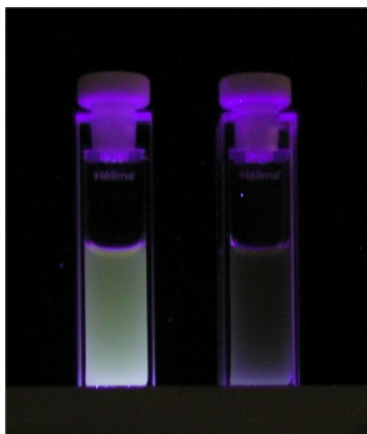

Figure SI 7. Photographs of  $m$ -CdSe/CdSe@SiO<sub>2</sub> (left) and  $m$ -[Fe<sub>3</sub>O<sub>4</sub>-CdSe/ZnSe]@SiO<sub>2</sub> (right) with Fe<sub>3</sub>O<sub>4</sub>:CdSe/ZnSe = 1:4 under UV light.

Table SI 1. The averaged size of NPs/PVP in Figure 2a-c measured by light scattering method

| Sample                      | NPs/PVP <sub>29K</sub> | NPs/PVP <sub>55K</sub> | NPs/PVP <sub>360K</sub> |
|-----------------------------|------------------------|------------------------|-------------------------|
| Intensity-based calculation | 93.7 ± 23.6            | 167.4 ± 61.6           | 417.0 ± 107.3           |
| Number-based calculation    | 66.8 ± 14.3            | 97.9 ± 22.4            | 293.1 ± 63.9            |

Table SI 2. Weight fractions of the magnetic Fe<sub>3</sub>O<sub>4</sub> cores in *s*-Fe<sub>3</sub>O<sub>4</sub>@SiO<sub>2</sub> and *m*-Fe<sub>3</sub>O<sub>4</sub>@SiO<sub>2</sub> measured by ICP-AES.

| Concentration of <i>s</i> -Fe <sub>3</sub> O <sub>4</sub> @SiO <sub>2</sub> (µg·mL <sup>-1</sup> ) | Concentration of Fe (ppm) | Concentration of Fe (µg·mL <sup>-1</sup> ) | Amount of total solution (mL) | Weight of total Fe (mg) | Weight of total Fe <sub>3</sub> O <sub>4</sub> (mg) | weight fraction of Fe <sub>3</sub> O <sub>4</sub> in <i>s</i> -Fe <sub>3</sub> O <sub>4</sub> @SiO <sub>2</sub> (%) |
|----------------------------------------------------------------------------------------------------|---------------------------|--------------------------------------------|-------------------------------|-------------------------|-----------------------------------------------------|---------------------------------------------------------------------------------------------------------------------|
| 2.13                                                                                               | 25.6                      | 25.6                                       | 10.0                          | 0.256                   | 0.354                                               | 1.66                                                                                                                |
| Concentration of <i>m</i> -Fe <sub>3</sub> O <sub>4</sub> @SiO <sub>2</sub> (µg·mL <sup>-1</sup> ) | Concentration of Fe (ppm) | Concentration of Fe (µg·mL <sup>-1</sup> ) | Amount of total solution (mL) | Weight of total Fe (mg) | Weight of total Fe <sub>3</sub> O <sub>4</sub> (mg) | weight fraction of Fe <sub>3</sub> O <sub>4</sub> in <i>m</i> -Fe <sub>3</sub> O <sub>4</sub> @SiO <sub>2</sub> (%) |
| 1.42                                                                                               | 45.2                      | 45.2                                       | 10.0                          | 0.452                   | 0.625                                               | 4.40                                                                                                                |
